# Supplementary material
Source: HighWire-hosted journal article supplement (https://www.jneurosci.org/highwire/filestream/602028/field_highwire_adjunct_files/0/Supplemental_Material.pdf)
Supplement: Supplemental_Material.pdf [file Supplemental_Material.pdf]

## Dopamine D2 receptor over-expression alters behavior and physiology in Drd2-EGFP mice

Paul F. Kramer, Christine H. Christensen, Lisa A. Hazelwood, Alice Dobi, Roland Bock, David R. Sibley, Yolanda Mateo, Veronica A. Alvarez

### SUPPLEMENTARY DATA

#### Downstream sequencing results using 3' forward primer:

GCCGNTNNNNNANNNNNNNNNNTCNANNTGNNNNNAGCTGTACAAGAAATGC  
GGCCCTAGAGCTCGCTGATCAGCCTCCACTGTNNNTTCTAGTTGCCAGCC  
ATCTGTTGTTAGCCCCTCCCCGTGCCTTCCTTGACCCTGGAAGGTGACA  
CTCCCCTGACCTTTCCTAATAAAATGAGGAAATTGCATCACATTGTCTG  
AGTAGGTGTCATTCTATTCTGGGGGGTGGGGTGGAAAATGTGTGCAAGTG  
TGAAGAAAAGAGATTGCTTCTAACTGTTAGATTAGTGN

#### Upstream sequencing results using 5' reverse primer:

NNNNNNNNNGNNTTGTCTNTNCGGTTGCCGCTGAGGCTTGCGTGCTGGT  
GCACTGATTGGATAGATGCTTGGCGAATTTGGAGGGTGAGACCGCAGGTT  
GGCCACATCGGCGGCTTTGGAGCATGNAGTTGGCANTGACGGCCTCTGCT  
TCATGTGGAGCAGATTGCCTTTNNGCCGATGCCGGTTACCGGATCGCGTT  
GCTGGCGAGGAGCTGGTCGAGCTGGACGGGNCGGNGTTAGGACAAGCTTC  
TGTTCTTCTAGCAGATGGTTAATAAAATGAAAGTTACATTTTTCAAGTGT  
AATAACATAAGTTTCAAAGAGCTAACTCATCCATTCTTTCATTTGCTCA  
ACACACTCACATGCACAGTTAGTTAGGAGTTCCAGAGTCTTGTGGTAGAA  
ACAGAAATGAGCATTCAATTAATTCTTGATGCTTTAACATTTATTAATCAC  
TTTACATGTGGCTAAAAAACACAGGCAAACAAAATATCCATGGTTTTGTA  
TCTTACATTCTAGAAGAAATAATAGCTATTGTGCTCAGCATCACACATCT  
GTAATTCCAGTTGCTCCAAATGCTGACGCACAGGGAGAGAAAATTC AAGG  
CTAGCCTGAGCTACAGAGTGA ACTCAAAGTCAGCTTGGCAACTTAGTCAA  
ACGCTGTCTCAAAACCAAAAAAAAAAATAAAAACTAAACTAAAAGAGAGG  
TTTTGGTATATTTT CAGTTGTATAGTATGCTTGCCTAGTATACAGAAGGCC  
CTGTGTCCTATCTTAGGTAATAGAAAGAATGAAAGCAATAGCCAATTAAT  
CAAGCAATTAACCTTTTGATAGTAGGGATTAGGAAATGAATTGGGCAGAG  
AAATACACACCCTANTTTATGTAATCAAGCAAGACTTTCTGATGGAAGTG  
ACATTCAACTTGAACTGGAGATATATAGGGATTAGACATNGTAGAGAGC  
TGGNNNANTATGGGAAAGGGTCCAGCCAGNAGCAGCAAAGNCCTATAATA  
GANATTTGNNNNAANCANATTCCTAGANGGTCTTTGGCATGATTGGATCA  
AGCAGCAGTACNGGGTTATATCNNANGNAGCAAAAANNNNNNCATTCTNNT  
GAACCCTGNCANN CNCNTTTANANNCTTGCCTCACNNANGANNAAATC
